# Supplementary material for: Cardiovascular risk factors burden in Saudi Arabia: The Africa Middle East Cardiovascular Epidemiological (ACE) study
Source: PubMed Central journal article supplement — J Saudi Heart Assoc. 2017 Mar 14;29(4):235–43. doi: 10.1016/j.jsha.2017.03.004 (PMC5623029; doi:10.1016/j.jsha.2017.03.004), 2017-03-14
Supplement: mmc1.pdf [file mmc1.pdf]

**Table S1.** Country distribution of the expatriates.

| Nationality | Frequency | Percentage | Nationality              | Frequency  | Percentage  |
|-------------|-----------|------------|--------------------------|------------|-------------|
| Algeria     | 1         | 0.3        | American Samoa           | 1          | 0.3         |
| Bangladesh  | 19        | 5.3        | Egypt                    | 78         | 21.9        |
| Eritrea     | 5         | 1.4        | Ethiopia                 | 2          | 0.6         |
| India       | 78        | 21.9       | Italy                    | 1          | 0.3         |
| Jordan      | 16        | 4.5        | Lebanon                  | 11         | 3.1         |
| Morocco     | 2         | 0.6        | Muritania                | 1          | 0.3         |
| Nepal       | 1         | 0.3        | Nigeria                  | 6          | 1.7         |
| Pakistan    | 56        | 15.7       | Palestinian              | 3          | 0.8         |
| Philippines | 24        | 6.7        | Somalia                  | 1          | 0.3         |
| Sri Lanka   | 1         | 0.3        | Sudan                    | 28         | 7.9         |
| Syria       | 11        | 3.1        | United States of America | 1          | 0.3         |
| Yemen       | 9         | 2.5        | <b>Total</b>             | <b>356</b> | <b>100%</b> |

**Table S2.** Subgroup analysis for the study cohort distributed by gender and age.

|                                     | Male         |             |                | Female       |             |                |
|-------------------------------------|--------------|-------------|----------------|--------------|-------------|----------------|
|                                     | SA nationals | Expatriates | <i>p-value</i> | SA nationals | Expatriates | <i>p-value</i> |
| <b>Age ≤ 45 y</b>                   |              |             |                |              |             |                |
| Dyslipidemia                        | 34 (54.8)    | 102 (76.1)  | 0.004          | 9 (20.9)     | 16 (34.8)   | 0.164          |
| Hypertension                        | 16 (24.2)    | 45 (33.1)   | 0.253          | 7 (13.5)     | 10 (20.4)   | 0.429          |
| Diabetes mellitus                   | 8 (12.9)     | 20 (14.9)   | 0.828          | 5 (11.6)     | 6 (13)      | 1.000          |
| Obese (BMI ≥ 30 mg/k <sup>2</sup> ) | 27 (40.9)    | 49 (36)     | 0.538          | 24 (46.2)    | 19 (38.8)   | 0.547          |
| Smoker                              | 23 (34.8)    | 37 (27.2)   | 0.325          | 1 (1.9)      | 2 (4.1)     | 0.611          |
| Abdominal obesity                   | 36 (54.5)    | 56 (41.2)   | 0.097          | 38 (73.1)    | 40 (81.6)   | 0.341          |
| <b>Age &gt; 45 y</b>                |              |             |                |              |             |                |
| Dyslipidemia                        | 39 (79.6)    | 126 (90.6)  | 0.073          | 14 (70)      | 18 (69.2)   | 1.000          |
| Hypertension                        | 28 (56)      | 97 (69.8)   | 0.084          | 9 (40.9)     | 16 (61.5)   | 0.246          |
| Diabetes mellitus                   | 24 (49)      | 62 (44.9)   | 0.739          | 4 (20)       | 7 (26.9)    | 0.732          |
| Obese (BMI ≥ 30 mg/k <sup>2</sup> ) | 31 (62)      | 56 (40.3)   | 0.013          | 16 (72.7)    | 20 (76.9)   | 0.751          |
| Smoker                              | 14 (28)      | 27 (19.4)   | 0.232          | 2 (9.1)      | 1 (3.8)     | 0.587          |
| Abdominal obesity                   | 35 (70)      | 65 (46.8)   | 0.005          | 18 (81.8)    | 25 (96.2)   | 0.165          |

All the data are presented as frequencies and percentages.

BMI = body mass index; SA = ethnic Saudi Arabia population

**Table S3.** Subgroup analysis for the study cohort based on main laboratory results.

|                                 | Male          |               | <i>p-value</i> | Female        |               | <i>p-value</i> |
|---------------------------------|---------------|---------------|----------------|---------------|---------------|----------------|
|                                 | SA nationals  | Expatriates   |                | SA nationals  | Expatriates   |                |
| LDL-cholesterol (mg/dL)         | 107.8 (30.81) | 112.3 (34.07) | 0.232          | 105.7 (22.34) | 101.6 (24.08) | 0.312          |
| HDL-cholesterol (mg/dL)         | 47.2 (8.80)   | 43.5 (9.49)   | < 0.001        | 50.3 (7.66)   | 47.4 (9.26)   | 0.049          |
| Fasting plasma glucose (mmol/L) | 6.2 (1.96)    | 6.2 (1.87)    | 0.882          | 5.6 (1.26)    | 5.9 (1.79)    | 0.286          |
| BMI (kg/m <sup>2</sup> )        | 30.5 (5.50)   | 29.0 (4.46)   | 0.003          | 30.4 (6.03)   | 30.6 (5.32)   | 0.819          |

All the data presented as a mean and standard deviation.

BMI = body mass index; HDL = high-density lipoprotein; LDL = low-density lipoprotein; SA = ethnic Saudi Arabia population.
